# Supplementary material
Source: Royal Society of Chemistry journal article supplement (doi:10.1039/d5nj05019g)
Supplement: d5nj05019g1.pdf [file d5nj05019g1.pdf]

# Supplementary Information

## Synthesis, Structures, Thermal Decomposition Mechanism, and Luminescence Properties of Sm(III), Pr(III), Nd(III), and La(III) Complexes with Diverse Carboxylate Coordination Modes

Ziyi Qu<sup>a</sup>, Jinjin Zhao<sup>a\*</sup>, Ning Ren<sup>b\*</sup>, Jianjun Zhang<sup>a\*</sup>

<sup>a</sup>Testing and Analysis Center, College of Chemistry and Materials

Science, Hebei Normal University, Shijiazhuang 050024, China

<sup>b</sup>College of Chemical Engineering and Materials, Hebei Key Laboratory

of Heterocyclic Compounds, Hebei Center for New Inorganic

Optoelectronic Nanomaterials Research, Handan University, Handan

056005, China

E-mail address: jjzhang6@126.com(ZJJ), ningren9@163.com(RN)

zhaojinjin@hebtu.edu.cn(ZJJ)

## Table of Contents

|                                                                                                                                                                                                                 |   |
|-----------------------------------------------------------------------------------------------------------------------------------------------------------------------------------------------------------------|---|
| Table S1 Crystallographic data for complexes <b>1-4</b> .....                                                                                                                                                   | 1 |
| Table S2 Main bond lengths of complexes <b>1-4</b> .....                                                                                                                                                        | 2 |
| Figure S1 Structural units of complex <b>2</b> (a) and complex <b>3</b> (b) .....                                                                                                                               | 5 |
| Figure S2 Coordination environments of Pr(III) ion (a) and Nd(III) ion(b)                                                                                                                                       | 5 |
| Figure S3 (a) XRD patterns of complexes <b>1-4</b> (b) Experimental XRD patterns of complexes <b>1</b> and <b>4</b> , simulated patterns from single-crystal data fitting, and XRD patterns of the ligands..... | 6 |
| Figure S4 TG-DTG/DSC curves of complex <b>2</b> (a) and complex <b>3</b> (b).....                                                                                                                               | 6 |
| Figure S5 3D infrared spectra of evolved gases from complex <b>2</b> (a) and complex <b>3</b> (b).....                                                                                                          | 7 |
| Figure S6 2D infrared spectra of evolved gases from complex <b>2</b> (a) and complex <b>3</b> (b).....                                                                                                          | 7 |

**Table S1** Crystallographic data for complexes **1-4**

| Complex                         | 1                                                                              | 2                                                                              | 3                                                                              | 4                                                                              |
|---------------------------------|--------------------------------------------------------------------------------|--------------------------------------------------------------------------------|--------------------------------------------------------------------------------|--------------------------------------------------------------------------------|
| Empirical formula               | C <sub>72</sub> H <sub>68</sub> N <sub>4</sub> O <sub>13</sub> Sm <sub>2</sub> | C <sub>72</sub> H <sub>68</sub> N <sub>4</sub> O <sub>13</sub> Pr <sub>2</sub> | C <sub>72</sub> H <sub>68</sub> N <sub>4</sub> O <sub>13</sub> Nd <sub>2</sub> | C <sub>88</sub> H <sub>82</sub> N <sub>4</sub> O <sub>16</sub> La <sub>2</sub> |
| Formula weight                  | 1498.00                                                                        | 1479.12                                                                        | 1485.78                                                                        | 1729.39                                                                        |
| Temperature                     | 293 (2) K                                                                      | 293 (2) K                                                                      | 293(2)K                                                                        | 293(2)K                                                                        |
| Wavelength                      | 0.71073 Å                                                                      | 0.71073 Å                                                                      | 0.71073 Å                                                                      | 0.71073 Å                                                                      |
| Crystal system                  | Triclinic                                                                      | Triclinic                                                                      | Triclinic                                                                      | monoclinic                                                                     |
| Space group                     | P-1                                                                            | P-1                                                                            | P-1                                                                            | P2 <sub>1</sub> /n                                                             |
| Unit cell dimensions            |                                                                                |                                                                                |                                                                                |                                                                                |
| a(Å)                            | 10.678(3) Å                                                                    | 10.739(3) Å                                                                    | 10.7209(10) Å                                                                  | 14.5700(15) Å                                                                  |
| b (Å)                           | 12.640(3) Å                                                                    | 12.608(4) Å                                                                    | 12.6673(12) Å                                                                  | 14.7415(16) Å                                                                  |
| c (Å)                           | 12.648(3) Å                                                                    | 12.675(4) Å                                                                    | 12.6770(13) Å                                                                  | 18.4795(18) Å                                                                  |
| α (°)                           | 89.183(9)°                                                                     | 89.093(10)°                                                                    | 88.981(4)°                                                                     | 90°                                                                            |
| β (°)                           | 66.989(8)°                                                                     | 67.669(10)°                                                                    | 67.262(3)°                                                                     | 89.995(4)°                                                                     |
| γ (°)                           | 82.021(8)°                                                                     | 81.574(11)°                                                                    | 81.700(3)°                                                                     | 90°                                                                            |
| Volume                          | 1554.6(7) Å <sup>3</sup>                                                       | 1568.9(8) Å <sup>3</sup>                                                       | 1569.8(3) Å <sup>3</sup>                                                       | 3969.1(7) Å <sup>3</sup>                                                       |
| Z, Density (calculated)         | 1, 1.600Mg/m <sup>3</sup>                                                      | 1, 1.566 Mg/m <sup>3</sup>                                                     | 1,1.572 Mg/m <sup>3</sup>                                                      | 2,1.447 Mg/m <sup>3</sup>                                                      |
| Absorption coefficient          | 1.941 mm <sup>-1</sup>                                                         | 1.604 mm <sup>-1</sup>                                                         | 1.705 mm <sup>-1</sup>                                                         | 1.132 mm <sup>-1</sup>                                                         |
| F(000)                          | 756.0                                                                          | 750                                                                            | 752                                                                            | 1760                                                                           |
| Crystal size(mm <sup>3</sup> )  | 0.18 × 0.09 × 0.03                                                             | 0.15 × 0.05 × 0.03                                                             | 0.22 × 0.12 × 0.06                                                             | 0.17 × 0.1 × 0.08                                                              |
| Theta range for data collection | 5.644 to 50.05°                                                                | 5.66 to 50.694°                                                                | 5.65 to 52.742°                                                                | 5.204 to 51.864°                                                               |
| Index ranges                    | -12 ≤ h ≤ 12,<br>-15 ≤ k ≤ 15,<br>-15 ≤ l ≤ 15                                 | -12 ≤ h ≤ 12,<br>-15 ≤ k ≤ 15,<br>-15 ≤ l ≤ 15                                 | -13 ≤ h ≤ 13,<br>-15 ≤ k ≤ 15,<br>-15 ≤ l ≤ 15                                 | -17 ≤ h ≤ 17,<br>-17 ≤ k ≤ 18,<br>-22 ≤ l ≤ 22                                 |
| Reflections collected           | 22658                                                                          | 20464                                                                          | 24845                                                                          | 60189                                                                          |
| Independent reflections         | 5467 (R <sub>(int)</sub> = 0.1204)                                             | 5720 (R <sub>(int)</sub> = 0.0920)                                             | 6409 (R <sub>(int)</sub> = 0.0464)                                             | 7653 (R <sub>(int)</sub> = 0.0699)                                             |
| Completeness to theta = 25.05°  | 99.7 %                                                                         | 99.6 %                                                                         | 99.7%                                                                          | 98.9%                                                                          |
| Max. and min. transmission      | 0.745 and 0.543                                                                | 0.743 and 0.625                                                                | 0.746 and 0.580                                                                | 0.745 and 0.625                                                                |
| Data / restraints / parameters  | 5467/0/421                                                                     | 5720/0/420                                                                     | 6409/0/420                                                                     | 7653/0/514                                                                     |

|                               |                                    |                                    |                                    |                                    |
|-------------------------------|------------------------------------|------------------------------------|------------------------------------|------------------------------------|
| Goodness-of-fit on F2         | 1.064                              | 1.157                              | 1.088                              | 1.103                              |
| Final R indices (I>2sigma(I)) | $R_I = 0.0780,$<br>$wR_2 = 0.1648$ | $R_I = 0.0691,$<br>$wR_2 = 0.1237$ | $R_I = 0.0451$<br>$wR_2 = 0.0987$  | $R_I = 0.0575,$<br>$wR_2 = 0.1116$ |
| R indices (all data)          | $R_I = 0.1086,$<br>$wR_2 = 0.1864$ | $R_I = 0.0933,$<br>$wR_2 = 0.1366$ | $R_I = 0.0515,$<br>$wR_2 = 0.1033$ | $R_I = 0.0777,$<br>$wR_2 = 0.1235$ |
| Largest diff. peak and hole   | 2.24 and -2.11 e.Å <sup>-3</sup>   | 1.61 and -1.34 e.Å <sup>-3</sup>   | 1.47 and -1.68 e.Å <sup>-3</sup>   | 2.20 and -1.26 e.Å <sup>-3</sup>   |

**Table S2** Main bond lengths of complexes 1-4

| complex1               |           |                  |            |
|------------------------|-----------|------------------|------------|
| Sm(1)O(4)1             | 2.375(7)  | O(5)Sm(1)N(2)    | 84.9(2)    |
| Sm(1)O(5) <sup>1</sup> | 2.798(7)  | O(5)Sm(1)N(1)    | 143.9(3)   |
| Sm(1)O(5)              | 2.380(7)  | O(5)1Sm(1)C(9)   | 25.4(2)    |
| Sm(1)O(3)              | 2.365(7)  | O(5)Sm(1)C(9)    | 103.4(3)   |
| Sm(1)O(6)1             | 2.413(7)  | O(5)1Sm(1)C(1)   | 134.4(3)   |
| Sm(1)O(1)              | 2.567(7)  | O(5)Sm(1)C(1)    | 108.1(3)   |
| Sm(1)O(2)              | 2.436(8)  | O(3)Sm(1)Sm(1)1  | 68.02(17)  |
| Sm(1)N(2)              | 2.614(9)  | O(3)Sm(1)O(4)1   | 133.3(2)   |
| Sm(1)N(1)              | 2.623(9)  | O(3)Sm(1)O(5)    | 80.1(2)    |
| O(4)1-Sm(1)-Sm(1)1     | 66.43(16) | O(3)Sm(1)O(5)1   | 66.8(2)    |
| O(4)1Sm(1)O(5)         | 73.7(2)   | O(3)Sm(1)O(6)1   | 82.2(2)    |
| O(4)1Sm(1)O(5)1        | 70.3(2)   | O(3)Sm(1)O(1)    | 146.6(2)   |
| O(4)1Sm(1)O(6)1        | 84.0(2)   | O(3)Sm(1)O(2)    | 142.1(2)   |
| O(4)1Sm(1)O(1)         | 73.6(2)   | O(3)Sm(1)N(2)    | 72.4(2)    |
| O(4)1Sm(1)O(2)         | 73.9(2)   | O(3)Sm(1)N(1)    | 77.3(3)    |
| O(4)1Sm(1)N(2)         | 140.2(2)  | O(3)Sm(1)C(9)1   | 70.2(3)    |
| O(4)1Sm(1)N(1)         | 141.1(2)  | O(3)Sm(1)C(1)    | 157.8(3)   |
| O(4)1Sm(1)C(9)1        | 79.0(3)   | O(6)1Sm(1)Sm(1)1 | 84.72(17)  |
| O(4)1Sm(1)C(1)         | 68.7(3)   | O(6)1Sm(1)O(5)1  | 49.5(2)    |
| O(5)Sm(1)Sm(1)1        | 42.77(17) | O(6)1Sm(1)O(1)   | 81.9(2)    |
| O(5)1Sm(1)Sm(1)1       | 35.27(14) | O(6)1Sm(1)O(2)   | 132.8(2)   |
| O(5)Sm(1)O(5)1         | 78.0(2)   | O(6)1Sm(1)N(2)   | 134.6(3)   |
| O(5)Sm(1)O(6)1         | 127.4(2)  | O(6)1Sm(1)N(1)   | 76.8(3)    |
| O(5)Sm(1)O(1)          | 132.3(2)  | O(6)1Sm(1)C(9)1  | 24.5(2)    |
| O(5)Sm(1)O(2)          | 85.8(3)   | O(6)1Sm(1)C(1)   | 84.9(2)    |
| complex2               |           |                  |            |
| Pr(1)O(1)              | 2.601(5)  | O(3)Pr(1)C(1)    | 134.50(18) |
| Pr(1)O(2)              | 2.479(5)  | O(3)Pr(1)C(9)1   | 108.4(2)   |
| Pr(1)O(3)              | 2.435(5)  | O(3)1Pr(1)C(9)1  | 103.15(19) |
| Pr(1)O(3)1             | 2.790(5)  | O(4)1Pr(1)Pr(1)1 | 25.53(17)  |
| Pr(1)O(4)1             | 2.464(5)  | O(4)1Pr(1)O(1)   | 85.47(11)  |

|                  |            |                  |            |
|------------------|------------|------------------|------------|
| Pr (1)O(5)       | 2.389(5)   | O(4)1Pr(1)O(2)   | 82.29(18)  |
| Pr(1)O(6)1       | 2.421(5)   | O(4)1Pr(1)O(3)1  | 132.60(18) |
| Pr (1)N(1)       | 2.692(6)   | O(4)1Pr(1)N(1)   | 49.86(14)  |
| Pr (1)N(2)       | 2.668(6)   | O(4)1Pr(1)N(2)   | 76.79(18)  |
| O(1)Pr(1)Pr(1)1  | 139.18(12) | O(4)1Pr(1)C(1)   | 133.94(18) |
| O(1)Pr(1)O(3)1   | 121.43(16) | O(4)1Pr(1)C(9)1  | 106.6(2)   |
| O(1)Pr(1)N(1)    | 70.29(18)  | O(5)Pr(1)Pr(1)1  | 24.58(18)  |
| O(1)Pr(1)N(2)    | 97.70(18)  | O(5)Pr(1)O(1)    | 68.42(12)  |
| O(1)Pr(1)C(1)    | 25.7(2)    | O(5)Pr(1)O(2)    | 146.88(17) |
| O(1)Pr(1)C(9)1   | 103.5(2)   | O(5)Pr(1)O(3)    | 141.25(18) |
| O(2)Pr(1)Pr(1)1  | 120.78(13) | O(5)Pr(1)O(3)1   | 79.81(17)  |
| O(2)Pr(1)O(1)    | 51.55(18)  | O(5)Pr(1)O(4)1   | 67.47(16)  |
| O(2)Pr(1)O(3)1   | 143.71(16) | O(5)Pr(1)O(6)1   | 82.97(18)  |
| O(2)Pr(1)N(1)    | 94.41(19)  | O(5)Pr(1)N(1)    | 133.38(17) |
| O(2)Pr(1)N(2)    | 70.90(18)  | O(5)Pr(1)N(2)    | 77.54(18)  |
| O(2)Pr(1)C(1)    | 26.2(2)    | O(5)Pr(1)C(1)    | 72.27(18)  |
| O(2)Pr(1)C(9)1   | 147.21(19) | O(5)Pr(1)C(9)1   | 157.15(19) |
| O(3)1Pr(1)Pr(1)1 | 35.68(9)   | O(6)1Pr(1)Pr(1)1 | 71.51(19)  |
| O(3)Pr(1)Pr(1)1  | 41.95(12)  | O(6)1Pr(1)O(1)   | 65.98(12)  |
| O(3)Pr(1)O(1)    | 132.04(17) | O(6)1Pr(1)O(2)   | 74.13(17)  |
| O(3)Pr(1)O(2)    | 86.18(18)  | O(6)1Pr(1)O(3)1  | 74.17(17)  |
| O(3)Pr(1)O(3)1   | 77.63(17)  | O(6)1Pr(1)O(3)   | 70.12(16)  |
| O(3)Pr(1)O(4)1   | 127.35(16) | O(6)1Pr(1)O(4)1  | 73.03(16)  |
| O(3)Pr(1)N(1)    | 144.13(17) | O(6)1Pr(1)N(1)   | 84.35(17)  |
| O(3)Pr(1)N(2)    | 86.25(17)  | O(6)1Pr(1)N(2)   | 141.47(17) |
| O(3)1Pr(1)C(1)   | 134.50(18) | O(6)1Pr(1)C(1)   | 140.28(18) |

---

**complex3**

---

|                                           |            |                                           |            |
|-------------------------------------------|------------|-------------------------------------------|------------|
| Nd(1)O(1)1                                | 2.785(3)   | O(2) <sup>1</sup> Nd(1)O(4)               | 49.71(10)  |
| Nd(1)O(1)                                 | 2.422(3)   | O(2) <sup>1</sup> Nd(1)O(3)               | 82.12(12)  |
| Nd(1)O(2)1                                | 2.444(3)   | O(2) <sup>1</sup> Nd(1)N(2)               | 132.33(11) |
| Nd(1)O(6)1                                | 2.417(3)   | O(2) <sup>1</sup> Nd(1)N(1)               | 134.33(12) |
| Nd(1)O(5)                                 | 2.399(3)   | O(2) <sup>1</sup> Nd(1)C(1) <sup>1</sup>  | 76.48(11)  |
| Nd(1)O(4)                                 | 2.590(4)   | O(2) <sup>1</sup> Nd(1)C(9)               | 24.73(11)  |
| Nd(1)O(3)                                 | 2.475(3)   | O(6) <sup>1</sup> Nd(1)Nd(1) <sup>1</sup> | 106.62(13) |
| Nd(1)N(2)                                 | 2.646(4)   | O(6) <sup>1</sup> Nd(1)O(1) <sup>1</sup>  | 66.59(7)   |
| Nd(1)N(1)                                 | 2.673(4)   | O(6) <sup>1</sup> Nd(1)O(1)               | 70.65(10)  |
| O(1) <sup>1</sup> Nd(1)Nd(1) <sup>1</sup> | 35.77(6)   | O(6) <sup>1</sup> Nd(1)O(2) <sup>1</sup>  | 73.51(11)  |
| O(1)Nd(1)Nd(1) <sup>1</sup>               | 42.24(7)   | O(6) <sup>1</sup> Nd(1)O(4)               | 84.41(11)  |
| O(1)Nd(1)O(1) <sup>1</sup>                | 78.00(11)  | O(6) <sup>1</sup> Nd(1)O(3)               | 73.72(11)  |
| O(1)Nd(1)O(2) <sup>1</sup>                | 127.57(10) | O(6) <sup>1</sup> Nd(1)N(2)               | 73.74(11)  |
| O(1)Nd(1)O(4)                             | 132.18(11) | O(6) <sup>1</sup> Nd(1)N(1)               | 139.91(12) |
| O(1)Nd(1)O(3)                             | 86.30(12)  | O(6) <sup>1</sup> Nd(1)C(1) <sup>1</sup>  | 141.20(11) |
| O(1)Nd(1)N(2)                             | 85.38(11)  | O(6) <sup>1</sup> Nd(1)C(9)               | 79.05(12)  |
| O(1)Nd(1)N(1)                             | 143.97(11) | O(5)Nd(1)Nd(1) <sup>1</sup>               | 49.71(10)  |

|                                           |            |                                           |            |
|-------------------------------------------|------------|-------------------------------------------|------------|
| O(1) <sup>1</sup> Nd(1)C(1) <sup>1</sup>  | 25.26(11)  | O(5)Nd(1)O(1)1                            | 68.65(12)  |
| O(1)Nd(1)C(1) <sup>1</sup>                | 103.24(11) | O(5)Nd(1)O(1)                             | 68.22(7)   |
| O(1) <sup>1</sup> Nd(1)C(9)               | 134.59(11) | O(5)Nd(1)O(2)1                            | 67.18(10)  |
| O(1)Nd(1)C(9)                             | 108.25(13) | O(5)Nd(1)O(6)1                            | 79.93(11)  |
| O(2) <sup>1</sup> Nd(1)Nd(1) <sup>1</sup> | 85.41(7)   | O(5)Nd(1)O(4)                             | 82.69(11)  |
| O(2) <sup>1</sup> Nd(1)O(1) <sup>1</sup>  | 35.77(6)   | O(5)Nd(1)O(3)                             | 133.73(11) |
| <hr/>                                     |            |                                           |            |
| complex4                                  |            |                                           |            |
| <hr/>                                     |            |                                           |            |
| La(1)O(5)                                 | 2.458(4)   | O(7)La(1)N(1)                             | 141.92(13) |
| La(1)O(5)1                                | 2.767(4)   | O(7)La(1)N(2)                             | 135.43(13) |
| La(1)O(7)                                 | 2.508(4)   | O(7)La(1)C(17)1                           | 79.40(12)  |
| La(1)O(3)                                 | 2.492(4)   | O(3)La(1)La(1) <sup>1</sup>               | 72.15(13)  |
| La(1)O(8)1                                | 2.497(4)   | O(3)La(1)O(5) <sup>1</sup>                | 115.88(9)  |
| La(1)O(6)1                                | 2.534(4)   | O(3)La(1)O(7)                             | 138.92(12) |
| La(1)O(1)                                 | 2.536(4)   | O(3)La(1)O(8) <sup>1</sup>                | 72.91(12)  |
| La(1)N(1)                                 | 2.722(4)   | O(3)La(1)O(6) <sup>1</sup>                | 141.86(13) |
| La(1)N(2)                                 | 2.732(5)   | O(3)La(1)O(1)                             | 133.72(13) |
| O(5)La(1)La(1)1                           | 40.74(9)   | O(3)La(1)N(1)                             | 72.41(13)  |
| O(5)1La(1)La(1)1                          | 35.43(7)   | O(3)La(1)N(2)                             | 104.20(13) |
| O(5)La(1)O(5)1                            | 76.18(13)  | O(3)La(1)C(17) <sup>1</sup>               | 69.75(13)  |
| O(5)La(1)O(7)                             | 77.47(12)  | O(8) <sup>1</sup> La(1)La(1) <sup>1</sup> | 142.80(14) |
| O(5)La(1)O(3)                             | 83.24(12)  | O(8) <sup>1</sup> La(1)O(5) <sup>1</sup>  | 66.67(8)   |
| O(5)La(1)O(8)1                            | 77.32(12)  | O(8) <sup>1</sup> La(1)O(7)               | 66.78(12)  |
| O(5)La(1)O(6)1                            | 125.33(12) | O(8) <sup>1</sup> La(1)O(6) <sup>1</sup>  | 132.24(12) |
| O(5)La(1)O(1)                             | 83.30(12)  | O(8) <sup>1</sup> La(1)O(1)               | 83.73(13)  |
| O(5)La(1)N(1)                             | 147.09(13) | O(8) <sup>1</sup> La(1)N(1)               | 72.96(13)  |
| O(5)La(1)N(2)                             | 148.58(13) | O(8) <sup>1</sup> La(1)N(2)               | 77.62(13)  |
| O(5)La(1)C(17)1                           | 101.19(13) | O(8) <sup>1</sup> La(1)C(17) <sup>1</sup> | 134.05(13) |
| O(5)1La(1)C(17)1                          | 25.07(12)  | O(6) <sup>1</sup> La(1)La(1) <sup>1</sup> | 73.87(13)  |
| O(7)La(1)La(1)1                           | 67.69(8)   | O(6) <sup>1</sup> La(1)O(5) <sup>1</sup>  | 84.66(8)   |
| O(7)La(1)O(5)1                            | 68.15(11)  | O(6) <sup>1</sup> La(1)O(1)               | 49.29(11)  |
| O(7)La(1)O(6)1                            | 78.81(13)  | O(6) <sup>1</sup> La(1)N(1)               | 138.15(13) |

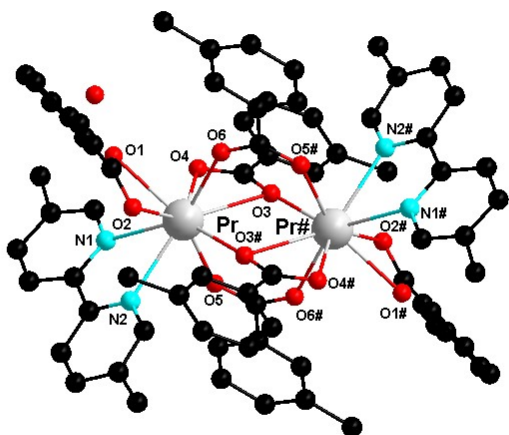

(a)

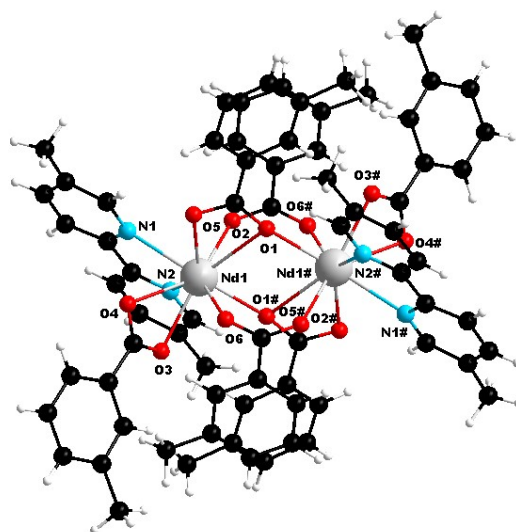

(b)

**Figure S1** Structural units of complex 2 (a) and complex 3 (b)

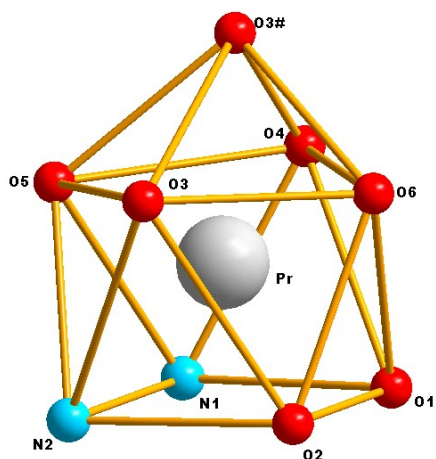

(a)

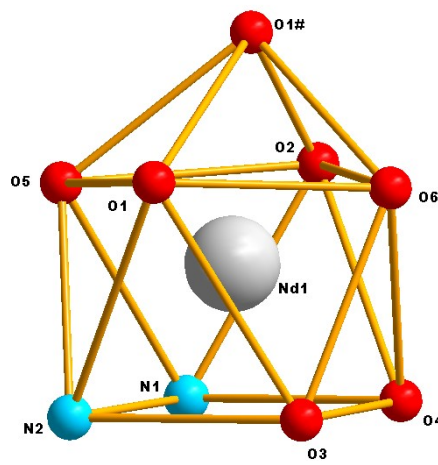

(b)

**Figure S2** Coordination environments of Pr(III) ion (a) and Nd(III) ion(b)

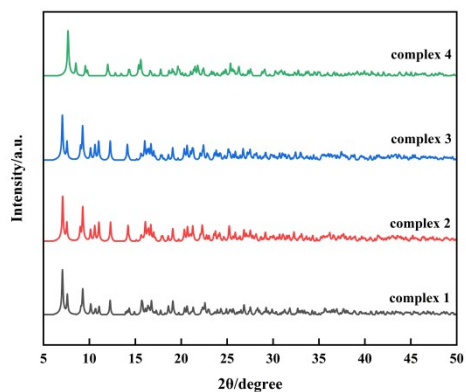

(a)

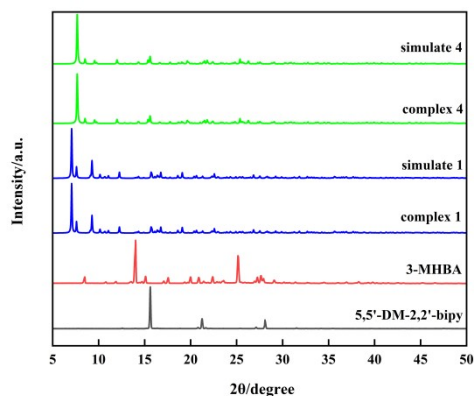

(b)

**Figure S3** (a) XRD patterns of complexes 1-4 (b) Experimental XRD patterns of complexes 1 and 4, simulated patterns from single-crystal data fitting, and XRD patterns of the ligands.

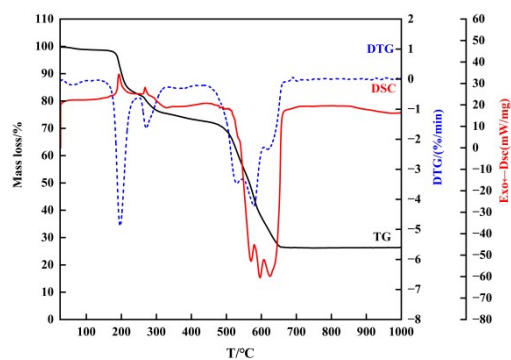

(a)

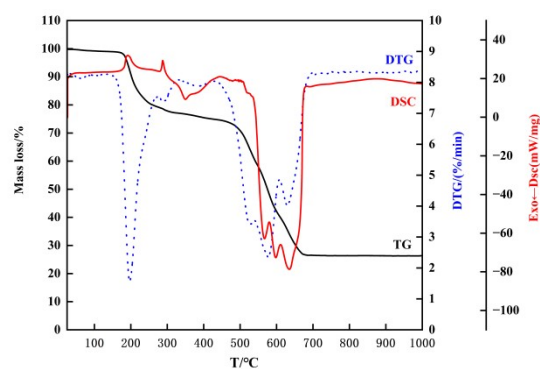

(b)

**Figure S4** TG-DTG/DSC curves of complex 2 (a) and complex 3 (b)

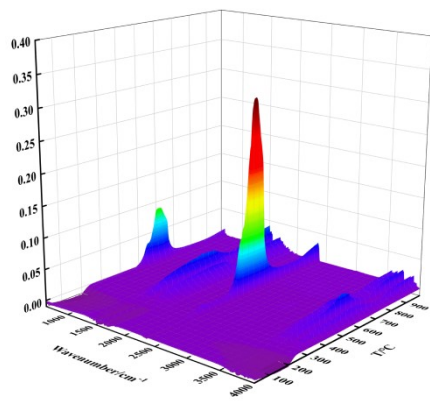

(a)

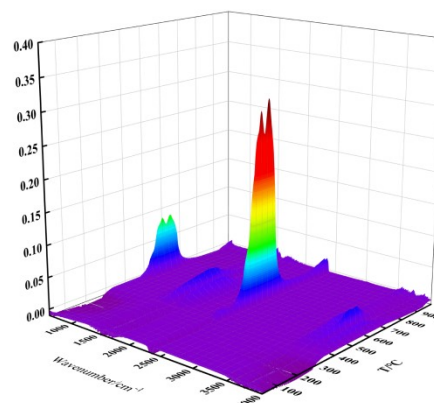

(b)

**Figure S5** 3D infrared spectra of evolved gases from complex **2** (a) and complex **3** (b)

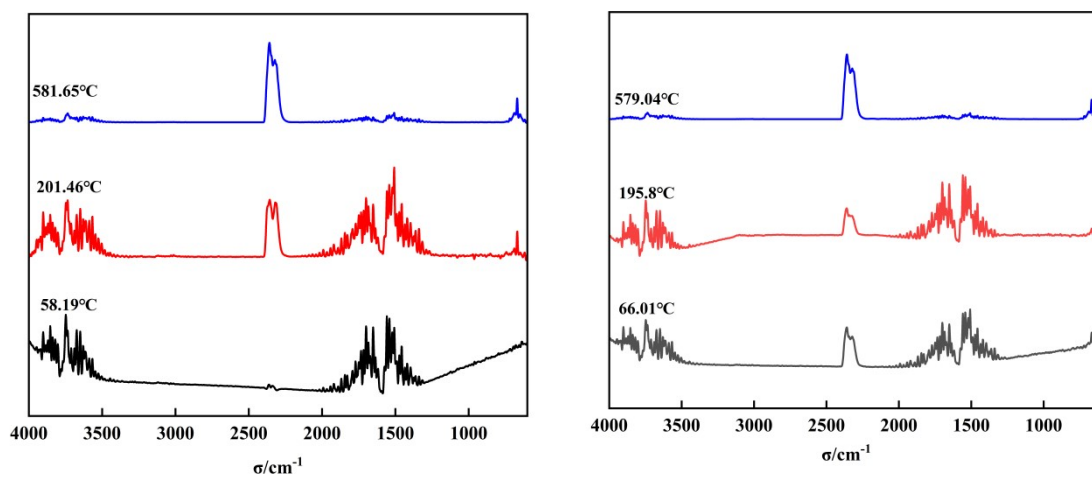

(a)

(b)

**Figure S6** 2D infrared spectra of evolved gases from complex **2** (a) and complex **3** (b)
